# Supplementary material
Source: PubMed Central journal article supplement (PMC5440843)
Supplement: NIHMS857133-supplement-1.pdf [file NIHMS857133-supplement-1.pdf]

## Supplemental Figure

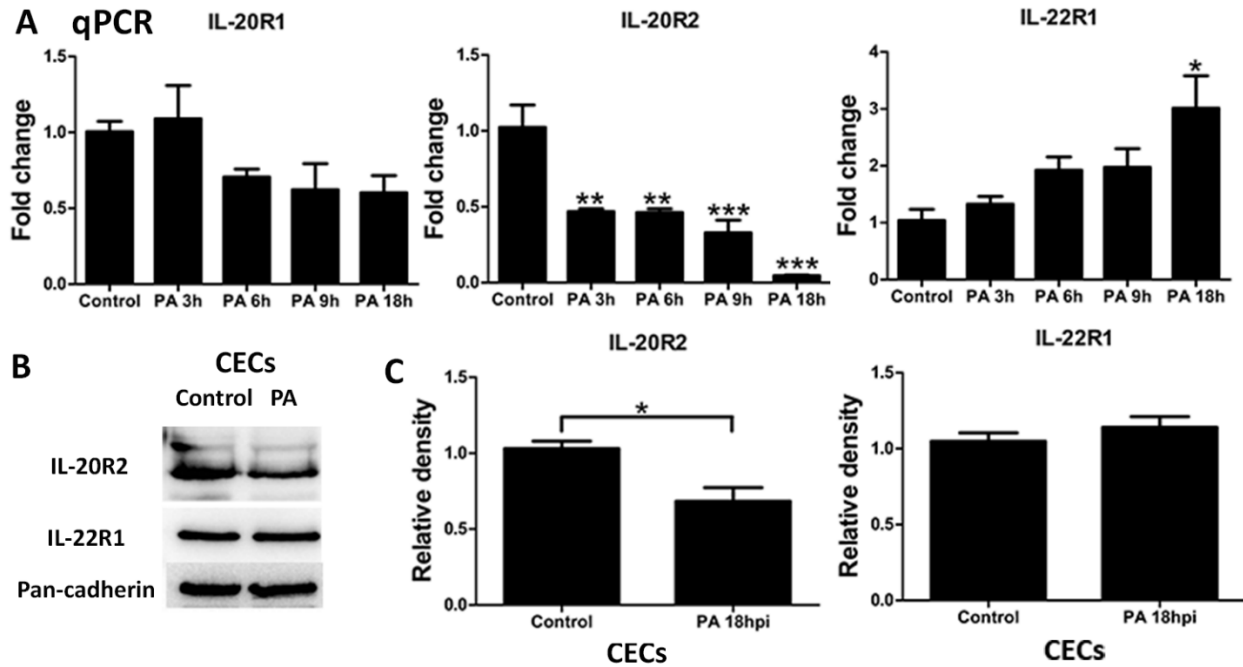

**Supplemental Figure.** The receptor expression of IL-20R cytokines in mouse cornea. Mouse corneas were infected with *PA* as in Fig. 2. Whole corneas were collected at 3 hpi, 6 hpi, 9 hpi, and 18 hpi for qPCR analysis of IL-20R1, IL-20R2, and IL-22R1 (A). Results are presented relative to those of naïve corneas, set as 1. (B) Immunoblot analysis of IL-20R2 (AF4388; R&D Systems) and IL-22R1 (MAB42941; R&D Systems) in cell lysates of mouse corneal epithelial cells infected with *PA* for 18 h (collected on mouse corneas). Pan-cadherin (#4068; Cell signaling technology) serves as the loading control. (C) Quantification of protein levels based on the densitometry of the Western blots in B. Stars on top of columns are P value results comparing with control. \* $P < 0.05$ , \*\* $P < 0.01$ , and \*\*\* $P < 0.001$  (ANOVA). Data are representative of three independent experiments (A: mean + s.e.m.). CECs: Corneal epithelial cells.
